# Supplementary material
Source: Research Square preprint supplement (doi:10.21203/rs.3.rs-9116705/v1)
Supplement: Supplementary file 1 [file 80f86854b1035705e117722e.xlsx]

## Sheet: Energy-SDG Interlinakges PC
		Is there published evidence of synergies or trade-offs between energy projects in post-conflict areas and the target?			KEY EVIDENCE DOMAIN(S)		SAMPLE REFERENCES
	GOAL OR TARGET IN THE 2030 AGENDA FOR SUSTAINABLE DEVELOPMENT			REASONING	Energy-planning in post-conflict areas	Sustainable development in post-conflict areas
		A) SYNERGY with PC Energy	B) TRADE-OFF with PC Energy
Goal 1: End poverty in all its forms everywhere
1.1	By 2030, eradicate extreme poverty for all people everywhere, currently measured as people living on less than $1.25 a day	1	1	A) Energy projects has the potential to significantly accelerate economic recovery in a post-conflict country. B) In some cases when energy projects focus on urban areas or politically privileged regions, the project can contribute to enhancing inequality in regions.	1		2) Ahmad, A., Chite, P., & Saghir, J. (2019). Post-conflict energy planning in the Middle East. Payne Institute,< aub. edu. lb/ifi/Documents/programs/energy_policy_and_security/articles/20191105_post_conflict_energy_ planning_in_middle_east. pdf> accessed, 11, 2021. 10) Al-akori, A., Ansari, D., Cader, C., Brahim, W., & Blechinger, P. (2023). Conflict, health, and electricity: An empirical assess…
1.2	By 2030, reduce at least by half the proportion of men, women and children of all ages living in poverty in all its dimensions according to national definitions	1		A) As 1.1	1		2) Ahmad, A., Chite, P., & Saghir, J. (2019). Post-conflict energy planning in the Middle East. Payne Institute,< aub. edu. lb/ifi/Documents/programs/energy_policy_and_security/articles/20191105_post_conflict_energy_ planning_in_middle_east. pdf> accessed, 11, 2021.
1.3	Implement nationally appropriate social protection systems and measures for all, including floors, and by 2030 achieve substantial coverage of the poor and the vulnerable		1	B) A cumulative effect of war is that degradation of energy infrastructure can lead to residents connecting to power lines without license or authorization. While ensuring that the residents basic needs are met, the authorities do not get any payment for unlicensed connections. This sometimes continues even a long time after a conflict has ended. This leads to a reduced budget for the authorities…		1	16) People, T. A. A. (2015). Urban Services During Protracted Armed Conflict.
1.4	By 2030, ensure that all men and women, in particular the poor and the vulnerable, have equal rights to economic resources, as well as access to basic services, ownership and control over land and other forms of property, inheritance, natural resources, appropriate new technology and financial services, including microfinance	1	1	A+B) As 1.1 and as energy projects in conflict zones are urgent, public participation sometimes becomes a second priority. While energy has the potential to empower people to return and regain control over their lives, the way these projects are implemented can also hinder ownership.	1		2) Ahmad, A., Chite, P., & Saghir, J. (2019). Post-conflict energy planning in the Middle East. Payne Institute,< aub. edu. lb/ifi/Documents/programs/energy_policy_and_security/articles/20191105_post_conflict_energy_ planning_in_middle_east. pdf> accessed, 11, 2021. 10) Al-akori, A., Ansari, D., Cader, C., Brahim, W., & Blechinger, P. (2023). Conflict, health, and electricity: An empirical assess…
1.5	By 2030, build the resilience of the poor and those in vulnerable situations and reduce their exposure and vulnerability to climate-related extreme events and other economic, social and environmental shocks and disasters	1		A) As 1.1 and climate adaptation strategies and conflict resilience strategies for energy proposes similar approaches and can therefore provide synergies with the target. A robust energy system that can withstand shock and have a fast recovery is both suitable for natural disasters as well as conflict.	1	1	2) Ahmad, A., Chite, P., & Saghir, J. (2019). Post-conflict energy planning in the Middle East. Payne Institute,< aub. edu. lb/ifi/Documents/programs/energy_policy_and_security/articles/20191105_post_conflict_energy_ planning_in_middle_east. pdf> accessed, 11, 2021. 23) Al-Saidi, M., Roach, E. L., & Al-Saeedi, B. A. H. (2020). Conflict resilience of water and energy supply infrastructure: Insight…
1.a	Ensure significant mobilization of resources from a variety of sources, including through enhanced development cooperation, in order to provide adequate and predictable means for developing countries, in particular least developed countries, to implement programmes and policies to end poverty in all its dimensions		0	No published evidence
1.b	Create sound policy frameworks at the national, regional and international levels, based on pro-poor and gender-sensitive development strategies, to support accelerated investment in poverty eradication actions	0	0	No published evidence	0	0
Goal 2. End hunger, achieve food security and improved nutrition, and promote sustainable agriculture
2.1	By 2030, end hunger and ensure access by all people, in particular the poor and people in vulnerable situations, including infants, to safe, nutritious and sufficient food all year round	1		A) Although food is often the first necessity provided in humanitarian situations, access to fuel and cooking technologies is often poorly funded. Energy in the form of fuels and cooking solutions can play a significant role in ensuring food security.		1	1) Thomas, P. J. M., Rosenberg-Jansen, S., & Jenks, A. (2021). Moving beyond informal action: sustainable energy and the humanitarian response system. Journal of International Humanitarian Action, 6, 1-20.
2.2	By 2030, end all forms of malnutrition, including achieving, by 2025, the internationally agreed targets on stunting and wasting in children under 5 years of age, and address the nutritional needs of adolescent girls, pregnant and lactating women and older persons	1		A) As 2.1		1	1) Thomas, P. J. M., Rosenberg-Jansen, S., & Jenks, A. (2021). Moving beyond informal action: sustainable energy and the humanitarian response system. Journal of International Humanitarian Action, 6, 1-20.
2.3	By 2030, double the agricultural productivity and incomes of small-scale food producers, in particular women, indigenous peoples, family farmers, pastoralists and fishers, including through secure and equal access to land, other productive resources and inputs, knowledge, financial services, markets and opportunities for value addition and non-farm employment	1		A) Peace opens up the possibility of modernizing agriculture and for better access to natural resources by the use of energy solutions. Combining modern farming with sustainable bioenergy procedures can help improve living standards in rural areas and increase productivity.	1		11) Gonzalez-Salazar, M. A., Venturini, M., Poganietz, W. R., Finkenrath, M., & Leal, M. R. L. (2017). Combining an accelerated deployment of bioenergy and land use strategies: Review and insights for a post-conflict scenario in Colombia. Renewable and Sustainable Energy Reviews, 73, 159-177.
2.4	By 2030, ensure sustainable food production systems and implement resilient agricultural practices that increase productivity and production, that help maintain ecosystems, that strengthen capacity for adaptation to climate change, extreme weather, drought, flooding and other disasters and that progressively improve land and soil quality	1		As 2.3	1		11) Gonzalez-Salazar, M. A., Venturini, M., Poganietz, W. R., Finkenrath, M., & Leal, M. R. L. (2017). Combining an accelerated deployment of bioenergy and land use strategies: Review and insights for a post-conflict scenario in Colombia. Renewable and Sustainable Energy Reviews, 73, 159-177.
2.5	By 2020, maintain the genetic diversity of seeds, cultivated plants and farmed and domesticated animals and their related wild species, including through soundly managed and diversified seed and plant banks at the national, regional and international levels, and promote access to and fair and equitable sharing of benefits arising from the utilization of genetic resources and associated traditiona…			No published evidence
2.a	Increase investment, including through enhanced international cooperation, in rural infrastructure, agricultural research and extension services, technology development and plant and livestock gene banks in order to enhance agricultural productive capacity in developing countries, in particular least developed countries	1	0	A) Peace opens up the possibility of modernizing agriculture and for better access to natural resources by the use of energy solutions. Combining modern farming with sustainable bioenergy procedures can help improve living standards in rural areas and increase productivity.	1		11) Gonzalez-Salazar, M. A., Venturini, M., Poganietz, W. R., Finkenrath, M., & Leal, M. R. L. (2017). Combining an accelerated deployment of bioenergy and land use strategies: Review and insights for a post-conflict scenario in Colombia. Renewable and Sustainable Energy Reviews, 73, 159-177.
2.b	Correct and prevent trade restrictions and distortions in world agricultural markets, including through the parallel elimination of all forms of agricultural export subsidies and all export measures with equivalent effect, in accordance with the mandate of the Doha Development Round	0	0	No published evidence	0	0
2.c	Adopt measures to ensure the proper functioning of food commodity markets and their derivatives and facilitate timely access to market information, including on food reserves, in order to help limit extreme food price volatility	0	0	No published evidence	0	0
Goal 3. Ensure healthy lives and promote wellbeing for all at all ages
3.1	By 2030, reduce the global maternal mortality ratio to less than 70 per 100,000 live births	1		A) Electricity is required in healthcare facilities for lighting, laboratory services, vaccine, blood and medicine storage, water heating and equipment sterilisation. Robust modern health services are even more important to maintain during conflict. No access to electricity results in reduced operations.		1	1) Thomas, P. J. M., Rosenberg-Jansen, S., & Jenks, A. (2021). Moving beyond informal action: sustainable energy and the humanitarian response system. Journal of International Humanitarian Action, 6, 1-20. 10) Al-akori, A., Ansari, D., Cader, C., Brahim, W., & Blechinger, P. (2023). Conflict, health, and electricity: An empirical assessment of the electrification of healthcare facilities in Yemen…
3.2	By 2030, end preventable deaths of newborns and children under 5 years of age, with all countries aiming to reduce neonatal mortality to at least as low as 12 per 1,000 live births and under-5 mortality to at least as low as 25 per 1,000 live births	1		A) As 3.1		1	1) Thomas, P. J. M., Rosenberg-Jansen, S., & Jenks, A. (2021). Moving beyond informal action: sustainable energy and the humanitarian response system. Journal of International Humanitarian Action, 6, 1-20. 10) Al-akori, A., Ansari, D., Cader, C., Brahim, W., & Blechinger, P. (2023). Conflict, health, and electricity: An empirical assessment of the electrification of healthcare facilities in Yemen…
3.3	By 2030, end the epidemics of AIDS, tuberculosis, malaria and neglected tropical diseases and combat hepatitis, water-borne diseases and other communicable diseases	1		A) As 3.1. Vaccination rates frequently decline in areas affected by conflict, and without alternative energy sources, vaccinations cannot be administered due to inadequate refrigeration.		1	1) Thomas, P. J. M., Rosenberg-Jansen, S., & Jenks, A. (2021). Moving beyond informal action: sustainable energy and the humanitarian response system. Journal of International Humanitarian Action, 6, 1-20. 10) Al-akori, A., Ansari, D., Cader, C., Brahim, W., & Blechinger, P. (2023). Conflict, health, and electricity: An empirical assessment of the electrification of healthcare facilities in Yemen…
3.4	By 2030, reduce by one third premature mortality from non-communicable diseases through prevention and treatment and promote mental health and well-being	1	1	A) As 3.1 B) Working in post-conflict areas poses a risk for workers. For instance there could be still mines on the ground as well as a risk for conflict arising.		1	1) Thomas, P. J. M., Rosenberg-Jansen, S., & Jenks, A. (2021). Moving beyond informal action: sustainable energy and the humanitarian response system. Journal of International Humanitarian Action, 6, 1-20. 10) Al-akori, A., Ansari, D., Cader, C., Brahim, W., & Blechinger, P. (2023). Conflict, health, and electricity: An empirical assessment of the electrification of healthcare facilities in Yemen…
3.5	Strengthen the prevention and treatment of substance abuse, including narcotic drug abuse and harmful use of alcohol			No published evidence
3.6	By 2020, halve the number of global deaths and injuries from road traffic accidents			No published evidence
3.7	By 2030, ensure universal access to sexual and reproductive health-care services, including for family planning, information and education, and the integration of reproductive health into national strategies and programmes			No published evidence
3.8	Achieve universal health coverage, including financial risk protection, access to quality essential health-care services and access to safe, effective, quality and affordable essential medicines and vaccines for all	1		A) As 3.1. Vaccination rates frequently decline in areas affected by conflict, and without alternative energy sources, vaccinations cannot be administered due to inadequate refrigeration.		1	1) Thomas, P. J. M., Rosenberg-Jansen, S., & Jenks, A. (2021). Moving beyond informal action: sustainable energy and the humanitarian response system. Journal of International Humanitarian Action, 6, 1-20. 10) Al-akori, A., Ansari, D., Cader, C., Brahim, W., & Blechinger, P. (2023). Conflict, health, and electricity: An empirical assessment of the electrification of healthcare facilities in Yemen…
3.9	By 2030, substantially reduce the number of deaths and illnesses from hazardous chemicals and air, water and soil pollution and contamination		1	B) Displaced communities and peacebuilding missions typically rely on traditional fuels which emit high concentrations of pollutants including carbon monoxide, particulate matter and other organic compounds when burned.		1	1) Thomas, P. J. M., Rosenberg-Jansen, S., & Jenks, A. (2021). Moving beyond informal action: sustainable energy and the humanitarian response system. Journal of International Humanitarian Action, 6, 1-20. 19) Esmenjaud, R., & Rutenbar, S. (2025). Renewable Energy and Peace in the Central African Republic.
3.a	Strengthen the implementation of the World Health Organization Framework Convention on Tobacco Control in all countries, as appropriate	0	0	No published evidence	0	0
3.b	Support the research and development of vaccines and medicines for the communicable and non-communicable diseases that primarily affect developing countries, provide access to affordable essential medicines and vaccines, in accordance with the Doha Declaration on the TRIPS Agreement and Public Health, which affirms the right of developing countries to use to the full the provisions in the Agreeme…			No published evidence
3.c	Substantially increase health financing and the recruitment, development, training and retention of the health workforce in developing countries, especially in least developed countries and small island developing States		0	No published evidence
3.d	Strengthen the capacity of all countries, in particular developing countries, for early warning, risk reduction and management of national and global health risks	1	0	A) Conflict resilient energy systems working with digital communication will help with early warning systems.	0	0	36) Thacker, S., Adshead, D., Fay, M., Hallegatte, S., Harvey, M., Meller, H., ... & Hall, J. W. (2019). Infrastructure for sustainable development. Nature Sustainability, 2(4), 324-331.
Goal 4. Ensure inclusive and equitable quality education and promote life-long learning opportunities for all
4.1	By 2030, ensure that all girls and boys complete free, equitable and quality primary and secondary education leading to relevant and effective learning outcomes	1		A) Energy projects in post-conflict areas could help sustain energy provision for schools. A conflict-resilient energy system may also reduce disruptions to schools during times of conflict.	1		3) Roach, E. L., & Al-Saidi, M. (2021). Rethinking infrastructure rehabilitation: Conflict resilience of urban water and energy supply in the Middle East and South Sudan. Energy Research & Social Science, 76, 102052. 13) Enhanced Rural Resilience in Yemen: ERRY Achievements 2016–2017
4.2	By 2030, ensure that all girls and boys have access to quality early childhood development, care and pre-primary education so that they are ready for primary education	1		As 4.1	1		3) Roach, E. L., & Al-Saidi, M. (2021). Rethinking infrastructure rehabilitation: Conflict resilience of urban water and energy supply in the Middle East and South Sudan. Energy Research & Social Science, 76, 102052. 13) Enhanced Rural Resilience in Yemen: ERRY Achievements 2016–2017
4.3	By 2030, ensure equal access for all women and men to affordable and quality technical, vocational and tertiary education, including university	1		As 4.1	1		3) Roach, E. L., & Al-Saidi, M. (2021). Rethinking infrastructure rehabilitation: Conflict resilience of urban water and energy supply in the Middle East and South Sudan. Energy Research & Social Science, 76, 102052. 13) Enhanced Rural Resilience in Yemen: ERRY Achievements 2016–2017
4.4	By 2030, substantially increase the number of youth and adults who have relevant skills, including technical and vocational skills, for employment, decent jobs and entrepreneurship	1		As 4.1	1		3) Roach, E. L., & Al-Saidi, M. (2021). Rethinking infrastructure rehabilitation: Conflict resilience of urban water and energy supply in the Middle East and South Sudan. Energy Research & Social Science, 76, 102052. 13) Enhanced Rural Resilience in Yemen: ERRY Achievements 2016–2017
4.5	By 2030, eliminate gender disparities in education and ensure equal access to all levels of education and vocational training for the vulnerable, including persons with disabilities, indigenous peoples and children in vulnerable situations			No published evidence
4.6	By 2030, ensure that all youth and a substantial proportion of adults, both men and women, achieve literacy and numeracy	1		A) Promoting renewable energy can alleviate the burden of unpaid care work such as collecting firewood or water, issues which rises in the aftermath of conflict, which also gives women and girls more time to attend school.		1	4) UNFPA (United Nations Population Fund). 2007. Challenges and Good Practices in Support of Women in Conflict and Post-Conflict Situations. New York: UNFPA. https://www.unfpa.org/ publications/challenges-and-good-practices-support-women-conflict-and-post-conflict-situations. 7) UN Women and UNIDO, 2023. Gender Equality and the Sustainable Energy Transition. New York and Vienna.
4.7	By 2030, ensure that all learners acquire the knowledge and skills needed to promote sustainable development, including, among others, through education for sustainable development and sustainable lifestyles, human rights, gender equality, promotion of a culture of peace and non-violence, global citizenship and appreciation of cultural diversity and of culture’s contribution to sustainable develo…	1		A) Lack of electricity to charge phones and power radios isolates women from important sources of information on rights, safety as well as limiting their access to potentially supportive social and economic networks. The provision of energy could enhance the security and well-being of women and girls in conflicts by facilitating better access to these critical resources and networks. Access to el…	1	1	4) UNFPA (United Nations Population Fund). 2007. Challenges and Good Practices in Support of Women in Conflict and Post-Conflict Situations. New York: UNFPA. https://www.unfpa.org/ publications/challenges-and-good-practices-support-women-conflict-and-post-conflict-situations. 5) Maier, E., Constant, S., & Ahmad, A. (2020). Gender in Energy Interventions in Fragile and Conflict Situations.
4.a	Build and upgrade education facilities that are child, disability and gender sensitive and provide safe, non-violent, inclusive and effective learning environments for all	1		A) As 4.1.	1		3) Roach, E. L., & Al-Saidi, M. (2021). Rethinking infrastructure rehabilitation: Conflict resilience of urban water and energy supply in the Middle East and South Sudan. Energy Research & Social Science, 76, 102052. 13) Enhanced Rural Resilience in Yemen: ERRY Achievements 2016–2017
4.b	By 2020, substantially expand globally the number of scholarships available to developing countries, in particular least developed countries, small island developing States and African countries, for enrolment in higher education, including vocational training and information and communications technology, technical, engineering and scientific programmes, in developed countries and other developi…		0	No published evidence
4.c	By 2030, substantially increase the supply of qualified teachers, including through international cooperation for teacher training in developing countries, especially least developed countries and small island developing States		0	No published evidence
Goal 5. Achieve gender equality and empower all women and girls
5.1	End all forms of discrimination against all women and girls everywhere	1		A) Women are more affected by indirect consequences of conflict in the form of lack of basic services such as energy and water. Lack of electricity to charge phones and power radios isolates women from important sources of information on rights, safety as well as limiting their access to potentially supportive social and economic networks. The provision of energy could enhance the security and we…	1	1	4) UNFPA (United Nations Population Fund). 2007. Challenges and Good Practices in Support of Women in Conflict and Post-Conflict Situations. New York: UNFPA. https://www.unfpa.org/ publications/challenges-and-good-practices-support-women-conflict-and-post-conflict-situations. 5) Maier, E., Constant, S., & Ahmad, A. (2020). Gender in Energy Interventions in Fragile and Conflict Situations.
5.2	Eliminate all forms of violence against all women and girls in the public and private spheres, including trafficking and sexual and other types of exploitation	1	1	A) Lack of electricity provision exacerbates women's feelings of insecurity and serves as a precursor to violence more broadly, with and particularly on gender-based violence in regions affected by conflict. Access to energy, digital communications and internet is instrumental in enhancing women's ability to obtain information, maintain connectivity, and access counseling services. B) Large-scale…	1	1	5) Maier, E., Constant, S., & Ahmad, A. (2020). Gender in Energy Interventions in Fragile and Conflict Situations. 6) UNFPA. 2017. The Humanitarian Impact of Gaza’s Electricity and Fuel Crisis on Gender-Based Violence and Services. New York: UNFPA.
5.3	Eliminate all harmful practices, such as child, early and forced marriage and female genital mutilation			No published evidence
5.4	Recognize and value unpaid care and domestic work through the provision of public services, infrastructure and social protection policies and the promotion of shared responsibility within the household and the family as nationally appropriate	1		A) Promoting renewable energy, can alleviate the burden of unpaid care work such as collecting firewood or water, issues which rises in the aftermath of conflict.		1	4) UNFPA (United Nations Population Fund). 2007. Challenges and Good Practices in Support of Women in Conflict and Post-Conflict Situations. New York: UNFPA. https://www.unfpa.org/ publications/challenges-and-good-practices-support-women-conflict-and-post-conflict-situations. 7) UN Women and UNIDO, 2023. Gender Equality and the Sustainable Energy Transition. New York and Vienna.
5.5	Ensure women’s full and effective participation and equal opportunities for leadership at all levels of decision-making in political, economic and public life	1	1	A) Involving women in the delivery of energy access initiatives and the decision-making on how energy is used in households and communities have great impact for sustainable energy use and reaching the target B) A gender disparity exists in the decision-making authority concerning the choices to connect to the electrical grid and the selection of specific energy sources or electrical appliances.	1	1	5) Maier, E., Constant, S., & Ahmad, A. (2020). Gender in Energy Interventions in Fragile and Conflict Situations. 7) UN Women and UNIDO, 2023. Gender Equality and the Sustainable Energy Transition. New York and Vienna.
5.6	Ensure universal access to sexual and reproductive health and reproductive rights as agreed in accordance with the Programme of Action of the International Conference on Population and Development and the Beijing Platform for Action and the outcome documents of their review conferences	1		A) Access to reliable energy enables healthcare facilities to operate essential services, such as maternal and neonatal care, which are crucial for achieving SRHR goals.	1		1) Thomas, P. J. M., Rosenberg-Jansen, S., & Jenks, A. (2021). Moving beyond informal action: sustainable energy and the humanitarian response system. Journal of International Humanitarian Action, 6, 1-20.
5.a	Undertake reforms to give women equal rights to economic resources, as well as access to ownership and control over land and other forms of property, financial services, inheritance and natural resources, in accordance with national laws	0	0	No published evidence	0	0
5.b	Enhance the use of enabling technology, in particular information and communications technology, to promote the empowerment of women	1	0	A) As 5.2	1	1	5) Maier, E., Constant, S., & Ahmad, A. (2020). Gender in Energy Interventions in Fragile and Conflict Situations.
5.c	Adopt and strengthen sound policies and enforceable legislation for the promotion of gender equality and the empowerment of all women and girls at all levels	0	0	No published evidence	0	0
Goal 6. Ensure availability and sustainable management of water and sanitation for all
6.1	By 2030, achieve universal and equitable access to safe and affordable drinking water for all	1		A) Energy plays a critical role and is needed for water pumping, purifying drinking water and providing clean water for hygiene purposes.	1		1) Thomas, P. J. M., Rosenberg-Jansen, S., & Jenks, A. (2021). Moving beyond informal action: sustainable energy and the humanitarian response system. Journal of International Humanitarian Action, 6, 1-20. https://www.sciencedirect.com/science/article/pii/S2214629621001456#b0150 23) Al-Saidi, M., Roach, E. L., & Al-Saeedi, B. A. H. (2020). Conflict resilience of water and energy supply infrastruc…
6.2	By 2030, achieve access to adequate and equitable sanitation and hygiene for all and end open defecation, paying special attention to the needs of women and girls and those in vulnerable situations	1		A) As 6.1	1		1) Thomas, P. J. M., Rosenberg-Jansen, S., & Jenks, A. (2021). Moving beyond informal action: sustainable energy and the humanitarian response system. Journal of International Humanitarian Action, 6, 1-20. https://www.sciencedirect.com/science/article/pii/S2214629621001456#b0150 23) Al-Saidi, M., Roach, E. L., & Al-Saeedi, B. A. H. (2020). Conflict resilience of water and energy supply infrastruc…
6.3	By 2030, improve water quality by reducing pollution, eliminating dumping and minimizing release of hazardous chemicals and materials, halving the proportion of untreated wastewater and substantially increasing recycling and safe reuse globally	1		A) As 6.1	1		1) Thomas, P. J. M., Rosenberg-Jansen, S., & Jenks, A. (2021). Moving beyond informal action: sustainable energy and the humanitarian response system. Journal of International Humanitarian Action, 6, 1-20. https://www.sciencedirect.com/science/article/pii/S2214629621001456#b0150 23) Al-Saidi, M., Roach, E. L., & Al-Saeedi, B. A. H. (2020). Conflict resilience of water and energy supply infrastruc…
6.4	By 2030, substantially increase water-use efficiency across all sectors and ensure sustainable withdrawals and supply of freshwater to address water scarcity and substantially reduce the number of people suffering from water scarcity	1		A) As 6.1	1		1) Thomas, P. J. M., Rosenberg-Jansen, S., & Jenks, A. (2021). Moving beyond informal action: sustainable energy and the humanitarian response system. Journal of International Humanitarian Action, 6, 1-20. https://www.sciencedirect.com/science/article/pii/S2214629621001456#b0150 23) Al-Saidi, M., Roach, E. L., & Al-Saeedi, B. A. H. (2020). Conflict resilience of water and energy supply infrastruc…
6.5	By 2030, implement integrated water resources management at all levels, including through transboundary cooperation as appropriate	1		As 6.1	1		1) Thomas, P. J. M., Rosenberg-Jansen, S., & Jenks, A. (2021). Moving beyond informal action: sustainable energy and the humanitarian response system. Journal of International Humanitarian Action, 6, 1-20. https://www.sciencedirect.com/science/article/pii/S2214629621001456#b0150 23) Al-Saidi, M., Roach, E. L., & Al-Saeedi, B. A. H. (2020). Conflict resilience of water and energy supply infrastruc…
6.6	By 2020, protect and restore water-related ecosystems, including mountains, forests, wetlands, rivers, aquifers and lakes			No published evidence
6.a	By 2030, expand international cooperation and capacity-building support to developing countries in water- and sanitation-related activities and programmes, including water harvesting, desalination, water efficiency, wastewater treatment, recycling and reuse technologies		0	No published evidence	0
6.b	Support and strengthen the participation of local communities in improving water and sanitation management	0	0	No published evidence	0	0
Goal 7. Ensure access to affordable, reliable, sustainable and modern energy for all
7.1	By 2030, ensure universal access to affordable, reliable and modern energy services	1		A) Energy poverty grows in conflict states, one reason being that energy infrastructure is often targeted in conflict. Energy projects in post conflict areas will by definition help to achieve the target.	1		2) Ahmad, A., Chite, P., & Saghir, J. (2019). Post-conflict energy planning in the Middle East. Payne Institute,< aub. edu. lb/ifi/Documents/programs/energy_policy_and_security/articles/20191105_post_conflict_energy_ planning_in_middle_east. pdf> accessed, 11, 2021. 30) Omar, F. A., Mahmoud, I., & Cedano, K. G. (2023). Energy poverty in the face of armed conflict: The challenge of appropriate ass…
7.2	By 2030, increase substantially the share of renewable energy in the global energy mix	1	1	A) Renewable energy, particularly solar power, can quickly deliver energy and is relatively easy to implement, making it an effective solution for urgent energy needs following a conflict. B) Displaced communities and post-conflict areas typically rely on traditional fuels which emit high concentrations of GHG-emissions. The urgent need for energy can sometimes call for fast and easy energy provi…	1	1	1) Thomas, P. J. M., Rosenberg-Jansen, S., & Jenks, A. (2021). Moving beyond informal action: sustainable energy and the humanitarian response system. Journal of International Humanitarian Action, 6, 1-20.
7.3	By 2030, double the global rate of improvement in energy efficiency	1		A) To have more energy efficient technologies will save the cost and amount of energy neeed which is crucial in a post-conflict area where the availability and cost of energy is a major issue.	1	1	1) Thomas, P. J. M., Rosenberg-Jansen, S., & Jenks, A. (2021). Moving beyond informal action: sustainable energy and the humanitarian response system. Journal of International Humanitarian Action, 6, 1-20. 2) Ahmad, A., Chite, P., & Saghir, J. (2019). Post-conflict energy planning in the Middle East. Payne Institute,< aub. edu. lb/ifi/Documents/programs/energy_policy_and_security/articles/2019110…
7.a	By 2030, enhance international cooperation to facilitate access to clean energy research and technology, including renewable energy, energy efficiency and advanced and cleaner fossil-fuel technology, and promote investment in energy infrastructure and clean energy technology		0	No published evidence
7.b	By 2030, expand infrastructure and upgrade technology for supplying modern and sustainable energy services for all in developing countries, in particular least developed countries, small island developing States, and land-locked developing countries, in accordance with their respective programmes of support	1	0	A) As 7.1 and 7.2	1	1	1) Thomas, P. J. M., Rosenberg-Jansen, S., & Jenks, A. (2021). Moving beyond informal action: sustainable energy and the humanitarian response system. Journal of International Humanitarian Action, 6, 1-20. 2) Ahmad, A., Chite, P., & Saghir, J. (2019). Post-conflict energy planning in the Middle East. Payne Institute,< aub. edu. lb/ifi/Documents/programs/energy_policy_and_security/articles/2019110…
Goal 8. Promote sustained, inclusive and sustainable economic growth, full and productive employment and decent work for all
8.1	Sustain per capita economic growth in accordance with national circumstances and, in particular, at least 7 per cent gross domestic product growth per annum in the least developed countries	1		A) Energy is imperative for peace and is an important step to speed up the recovery for economic recovery in a post-conflict country.	1		2) Ahmad, A., Chite, P., & Saghir, J. (2019). Post-conflict energy planning in the Middle East. Payne Institute,< aub. edu. lb/ifi/Documents/programs/energy_policy_and_security/articles/20191105_post_conflict_energy_ planning_in_middle_east. pdf> accessed, 11, 2021. 28) Ohiorhenuan, J. F. (2011). Post-conflict recovery: approaches, policies and partnerships. Centre for Research on Peace and Devel…
8.2	Achieve higher levels of economic productivity through diversification, technological upgrading and innovation, including through a focus on high-value added and labour-intensive sectors	1		A) As 8.1	1		2) Ahmad, A., Chite, P., & Saghir, J. (2019). Post-conflict energy planning in the Middle East. Payne Institute,< aub. edu. lb/ifi/Documents/programs/energy_policy_and_security/articles/20191105_post_conflict_energy_ planning_in_middle_east. pdf> accessed, 11, 2021. 28) Ohiorhenuan, J. F. (2011). Post-conflict recovery: approaches, policies and partnerships. Centre for Research on Peace and Devel…
8.3	Promote development-oriented policies that support productive activities, decent job creation, entrepreneurship, creativity and innovation, and encourage the formalization and growth of micro-, small- and medium-sized enterprises, including through access to financial services	1		A) Private companies can play a large role in infrastructure development and a bottom-up approach can help with a fast energy development. Local businesses might be called on to do more than simply implement projects as contractors. In many cases their knowledge of the complexities of the local society and obstacles faced is invaluable, particularly when the “brain drain” has depleted public auth…	1	1	3) Roach, E. L., & Al-Saidi, M. (2021). Rethinking infrastructure rehabilitation: Conflict resilience of urban water and energy supply in the Middle East and South Sudan. Energy Research & Social Science, 76, 102052. 13) Enhanced Rural Resilience in Yemen: ERRY Achievements 2016–2017 16) People, T. A. A. (2015). Urban Services During Protracted Armed Conflict.
8.4	Improve progressively, through 2030, global resource efficiency in consumption and production and endeavour to decouple economic growth from environmental degradation, in accordance with the 10-year framework of programmes on sustainable consumption and production, with developed countries taking the lead			No published evidence
8.5	By 2030, achieve full and productive employment and decent work for all women and men, including for young people and persons with disabilities, and equal pay for work of equal value	1	1	A+B) In the aftermath of conflict, certain sectors can suffer from brain drain and a lack of knowledge. Improving the local capacity of new employees can help solve both this and other issues. For instance, involving women in the delivery of energy access initiatives and the decision-making on how energy is used in households and communities have great impact for sustainable energy use and reachi…	1	1	5) Maier, E., Constant, S., & Ahmad, A. (2020). Gender in Energy Interventions in Fragile and Conflict Situations. 7) UN Women and UNIDO, 2023. Gender Equality and the Sustainable Energy Transition. New York and Vienna. 16) People, T. A. A. (2015). Urban Services During Protracted Armed Conflict. 29) Escobar, R., Vilar, D., Velo, E., Ferrer-Martí, L., & Domenech, B. (2012). Promoting and improvin…
8.6	By 2020, substantially reduce the proportion of youth not in employment, education or training	1		A) Renewable energy can be a way to engage young people in employment again after a conflict, for example, youth have been trained in solar panel works in Yemen	1		13) Enhanced Rural Resilience in Yemen: ERRY Achievements 2016–2017
8.7	Take immediate and effective measures to eradicate forced labour, end modern slavery and human trafficking and secure the prohibition and elimination of the worst forms of child labour, including recruitment and use of child soldiers, and by 2025 end child labour in all its forms		1	B) After a conflict illegal activity can flourish and the economy takes a while to recover. During this time (for instance) illegal mining activities can take place, often for minerals needed in the energy sector.		1	27) Mukete, B., Sun, Y., Zama, E., Achem, B., Mukete, T., Ndolo, L., & Lonje, B. (2016). Environmental degradation in conflict and post-conflict regions. International Journal of Environmental Protection and Policy, 4(6), 187-195.
8.8	Protect labour rights and promote safe and secure working environments for all workers, including migrant workers, in particular women migrants, and those in precarious employment		1	B) Working in post-conflict areas poses a risk for workers. For instance there could be still mines on the ground and a risk for conflict arising.	1		15) UNOPS (n.d.) Improving safety and security in post-conflict countries
8.9	By 2030, devise and implement policies to promote sustainable tourism that creates jobs and promotes local culture and products			No published evidence
8.1	Strengthen the capacity of domestic financial institutions to encourage and expand access to banking, insurance and financial services for all			No published evidence
8.a	Increase Aid for Trade support for developing countries, in particular least developed countries, including through the Enhanced Integrated Framework for Trade-Related Technical Assistance to Least Developed Countries			No published evidence
8.b	By 2020, develop and operationalize a global strategy for youth employment and implement the Global Jobs Pact of the International Labour Organization		0	No published evidence
Goal 9. Build resilient infrastructure, promote inclusive and sustainable industrialization and foster innovation
9.1	Develop quality, reliable, sustainable and resilient infrastructure, including regional and transborder infrastructure, to support economic development and human well-being, with a focus on affordable and equitable access for all	1	1	A) Renewables and off-grid solutions are less vulnerable to attacks on fuel supply and fuel routes and can still work even though surrounding infrastructure is damaged B) Diesel generators and other fossil fuels can be unresilient due to dependency on other countries for instance on importing fuels. In some cases, the urgent need for energy can be prioritized higher than resilience.	1	1	2) Ahmad, A., Chite, P., & Saghir, J. (2019). Post-conflict energy planning in the Middle East. Payne Institute,< aub. edu. lb/ifi/Documents/programs/energy_policy_and_security/articles/20191105_post_conflict_energy_ planning_in_middle_east. pdf> accessed, 11, 2021. 3) Roach, E. L., & Al-Saidi, M. (2021). Rethinking infrastructure rehabilitation: Conflict resilience of urban water and energy supp…
9.2	Promote inclusive and sustainable industrialization and, by 2030, significantly raise industry’s share of employment and gross domestic product, in line with national circumstances, and double its share in least developed countries	1		A) As 9.1 and 8.1	1	1	2) Ahmad, A., Chite, P., & Saghir, J. (2019). Post-conflict energy planning in the Middle East. Payne Institute,< aub. edu. lb/ifi/Documents/programs/energy_policy_and_security/articles/20191105_post_conflict_energy_ planning_in_middle_east. pdf> accessed, 11, 2021. 3) Roach, E. L., & Al-Saidi, M. (2021). Rethinking infrastructure rehabilitation: Conflict resilience of urban water and energy supp…
9.3	Increase the access of small-scale industrial and other enterprises, in particular in developing countries, to financial services, including affordable credit, and their integration into value chains and markets	1		A) Private companies can play a large role in infrastructure development and a bottom-up approach can help with a fast energy development. Local businesses might be called on to do more than simply implement projects as contractors. In many cases their knowledge of the complexities of the local society and obstacles faced is invaluable, particularly when the “brain drain” has depleted public auth…		1	3) Roach, E. L., & Al-Saidi, M. (2021). Rethinking infrastructure rehabilitation: Conflict resilience of urban water and energy supply in the Middle East and South Sudan. Energy Research & Social Science, 76, 102052. 13) Enhanced Rural Resilience in Yemen: ERRY Achievements 2016–2017 16) People, T. A. A. (2015). Urban Services During Protracted Armed Conflict.
9.4	By 2030, upgrade infrastructure and retrofit industries to make them sustainable, with increased resource-use efficiency and greater adoption of clean and environmentally sound technologies and industrial processes, with all countries taking action in accordance with their respective capabilities		1	B) Energy infrastructure is often targeted in armed conflicts and the extent they have been destroyed affects if and how retrofitting is possible. To build new infrastructure might sometimes be the only possible way to ensure energy access.	1		20) Månsson, A. (2014). Energy, conflict and war: Towards a conceptual framework. Energy Research & Social Science, 4, 106-116.
9.5	Enhance scientific research, upgrade the technological capabilities of industrial sectors in all countries, in particular developing countries, including, by 2030, encouraging innovation and substantially increasing the number of research and development workers per 1 million people and public and private research and development spending			No published evidence
9.a	Facilitate sustainable and resilient infrastructure development in developing countries through enhanced financial, technological and technical support to African countries, least developed countries, landlocked developing countries and small island developing States		0	No published evidence	0
9.b	Support domestic technology development, research and innovation in developing countries, including by ensuring a conducive policy environment for, inter alia, industrial diversification and value addition to commodities	1	0	As 9.1	0	1	2) Ahmad, A., Chite, P., & Saghir, J. (2019). Post-conflict energy planning in the Middle East. Payne Institute,< aub. edu. lb/ifi/Documents/programs/energy_policy_and_security/articles/20191105_post_conflict_energy_ planning_in_middle_east. pdf> accessed, 11, 2021. 3) Roach, E. L., & Al-Saidi, M. (2021). Rethinking infrastructure rehabilitation: Conflict resilience of urban water and energy supp…
9.c	Significantly increase access to information and communications technology and strive to provide universal and affordable access to the Internet in least developed countries by 2020	1		A) Lack of electricity provision exacerbates women's feelings of insecurity and serves as a precursor to violence more broadly, with and particularly on gender-based violence in regions affected by conflict. Access to energy is instrumental in enhancing women's ability to obtain information, maintain connectivity, and access counseling services.	1	1	5) Maier, E., Constant, S., & Ahmad, A. (2020). Gender in Energy Interventions in Fragile and Conflict Situations. 6) UNFPA. 2017. The Humanitarian Impact of Gaza’s Electricity and Fuel Crisis on Gender-Based Violence and Services. New York: UNFPA.
Goal 10. Reduce inequality within and among countries
10.1	By 2030, progressively achieve and sustain income growth of the bottom 40 per cent of the population at a rate higher than the national average	1	1	A) As 8.1 B) In some cases when energy projects focus on urban areas or politically privileged regions, the project can contribute to enhancing inequality in regions.	1		2) Ahmad, A., Chite, P., & Saghir, J. (2019). Post-conflict energy planning in the Middle East. Payne Institute,< aub. edu. lb/ifi/Documents/programs/energy_policy_and_security/articles/20191105_post_conflict_energy_ planning_in_middle_east. pdf> accessed, 11, 2021. 10) Al-akori, A., Ansari, D., Cader, C., Brahim, W., & Blechinger, P. (2023). Conflict, health, and electricity: An empirical assess…
10.2	By 2030, empower and promote the social, economic and political inclusion of all, irrespective of age, sex, disability, race, ethnicity, origin, religion or economic or other status	1	1	A) Involving women in the delivery of energy access initiatives and the decision-making on how energy is used in households and communities have great impact for sustainable energy use and reaching the target. B) A gender disparity exists in the decision-making authority concerning the choices to connect to the electrical grid and the selection of specific energy sources or electrical appliances.	1	1	5) Maier, E., Constant, S., & Ahmad, A. (2020). Gender in Energy Interventions in Fragile and Conflict Situations. 7) UN Women and UNIDO, 2023. Gender Equality and the Sustainable Energy Transition. New York and Vienna.
10.3	Ensure equal opportunity and reduce inequalities of outcome, including by eliminating discriminatory laws, policies and practices and promoting appropriate legislation, policies and action in this regard	1	1	A+B) In some cases when energy projects focus on urban areas or politically privileged regions, enhancing inequality in regions. At the same time, energy projects providing electricity to vulnerable and rural communities can help to achieve equality.	1		2) Ahmad, A., Chite, P., & Saghir, J. (2019). Post-conflict energy planning in the Middle East. Payne Institute,< aub. edu. lb/ifi/Documents/programs/energy_policy_and_security/articles/20191105_post_conflict_energy_ planning_in_middle_east. pdf> accessed, 11, 2021. 10) Al-akori, A., Ansari, D., Cader, C., Brahim, W., & Blechinger, P. (2023). Conflict, health, and electricity: An empirical assess…
10.4	Adopt policies, especially fiscal, wage and social protection policies, and progressively achieve greater equality			No published evidence
10.5	Improve the regulation and monitoring of global financial markets and institutions and strengthen the implementation of such regulations			No published evidence
10.6	Ensure enhanced representation and voice for developing countries in decision-making in global international economic and financial institutions in order to deliver more effective, credible, accountable and legitimate institutions			No published evidence
10.7	Facilitate orderly, safe, regular and responsible migration and mobility of people, including through the implementation of planned and well-managed migration policies	1		A) Energy is crucial in refugee camps, even though sometimes not prioritized. It is essential for maintaining safety and providing safe, clean cooking options.	1		1) Thomas, P. J. M., Rosenberg-Jansen, S., & Jenks, A. (2021). Moving beyond informal action: sustainable energy and the humanitarian response system. Journal of International Humanitarian Action, 6, 1-20. 17) Thomas, P. J. M. (2016, January). Energy Access: Humanitarian Relief.
10.a	Implement the principle of special and differential treatment for developing countries, in particular least developed countries, in accordance with World Trade Organization agreements		0	No published evidence
10.b	Encourage official development assistance and financial flows, including foreign direct investment, to States where the need is greatest, in particular least developed countries, African countries, small island developing States and landlocked developing countries, in accordance with their national plans and programmes		0	No published evidence
10.c	By 2030, reduce to less than 3 per cent the transaction costs of migrant remittances and eliminate remittance corridors with costs higher than 5 per cent	0	0	No published evidence	0	0
Goal 11. Make cities and human settlements inclusive, safe, resilient and sustainable
11.1	By 2030, ensure access for all to adequate, safe and affordable housing and basic services and upgrade slums	1		A) Energy systems play a vital role in the rebuilding of cities in the form of fuel for transport and to enhance housing conditions with electricity. For city planning to reconstruct a city after a conflict tools such as BIM and GIS have been proven helpful. To access and use these tools, energy is needed.		1	9) Assem, A., Abdelmohsen, S., & Ezzeldin, M. (2019). Smart management of the reconstruction process of post-conflict cities. Archnet-IJAR: International Journal of Architectural Research, 14(2), 325-343.
11.2	By 2030, provide access to safe, affordable, accessible and sustainable transport systems for all, improving road safety, notably by expanding public transport, with special attention to the needs of those in vulnerable situations, women, children, persons with disabilities and older persons	1		A) As 11.1		1	9) Assem, A., Abdelmohsen, S., & Ezzeldin, M. (2019). Smart management of the reconstruction process of post-conflict cities. Archnet-IJAR: International Journal of Architectural Research, 14(2), 325-343.
11.3	By 2030, enhance inclusive and sustainable urbanization and capacity for participatory, integrated and sustainable human settlement planning and management in all countries	1		A) As 11.1		1	9) Assem, A., Abdelmohsen, S., & Ezzeldin, M. (2019). Smart management of the reconstruction process of post-conflict cities. Archnet-IJAR: International Journal of Architectural Research, 14(2), 325-343.
11.4	Strengthen efforts to protect and safeguard the world’s cultural and natural heritage	1		A) As 11.1		1	9) Assem, A., Abdelmohsen, S., & Ezzeldin, M. (2019). Smart management of the reconstruction process of post-conflict cities. Archnet-IJAR: International Journal of Architectural Research, 14(2), 325-343.
11.5	By 2030, significantly reduce the number of deaths and the number of people affected and substantially decrease the direct economic losses relative to global gross domestic product caused by disasters, including water-related disasters, with a focus on protecting the poor and people in vulnerable situations	1		A) There is evidence that energy access plays a key role in disaster relief supporting immediate wellbeing and providing livelihood opportunities. Reducing the number of deaths can also be a result from energy projects contributing with energy to hospitals and health facilities.	1		1) Thomas, P. J. M., Rosenberg-Jansen, S., & Jenks, A. (2021). Moving beyond informal action: sustainable energy and the humanitarian response system. Journal of International Humanitarian Action, 6, 1-20. 17) Thomas, P. J. M. (2016, January). Energy Access: Humanitarian Relief.
11.6	By 2030, reduce the adverse per capita environmental impact of cities, including by paying special attention to air quality and municipal and other waste management	1	1	A + B) Energy provision in post-conflict areas can be both in the form of renewable energy or based on fossil fuels. Depending on the type used, the environmental impacts from the cities can vary and there will be either synergies or trade-offs with the target.	1		1) Thomas, P. J. M., Rosenberg-Jansen, S., & Jenks, A. (2021). Moving beyond informal action: sustainable energy and the humanitarian response system. Journal of International Humanitarian Action, 6, 1-20. https://www.sciencedirect.com/science/article/pii/S2214629624003839#bb0180 19) Esmenjaud, R., & Rutenbar, S. (2025). Renewable Energy and Peace in the Central African Republic.
11.7	By 2030, provide universal access to safe, inclusive and accessible, green and public spaces, in particular for women and children, older persons and persons with disabilities			No published evidence
11.a	Support positive economic, social and environmental links between urban, per-urban and rural areas by strengthening national and regional development planning		0	No published evidence	0
11.b	By 2020, substantially increase the number of cities and human settlements adopting and implementing integrated policies and plans towards inclusion, resource efficiency, mitigation and adaptation to climate change, resilience to disasters, and develop and implement, in line with the Sendai Framework for Disaster Risk Reduction 2015-2030, holistic disaster risk management at all levels		0	No published evidence
11.c	Support least developed countries, including through financial and technical assistance, in building sustainable and resilient buildings utilizing local materials	1		A) Many humanitarian aid projects in post conflict countries come from developed countries and The World Bank. Many times the aid is not specifically announced to be used for energy systems but some is allocated to sanitary projects or water access where energy plays a big part.		1	31) World Bank. 2024. World Bank Annual Report 2024. Washington, DC: World Bank. doi: 10.1596/AR2024EN.
Goal 12. Ensure sustainable consumption and production patterns
12.1	Implement the 10-year framework of programmes on sustainable consumption and production, all countries taking action, with developed countries taking the lead, taking into account the development and capabilities of developing countries			No published evidence
12.2	By 2030, achieve the sustainable management and efficient use of natural resources	1	1	A) Access to energy and electricity can help with debris and rubble management in conflict zone and provide help with the recycling of debris B) The use of critical minerals in RE are often very conflict related and after a conflict illegal and unsustainable mining activities can take place, often for minerals needed in the energy sector.		1	22) United Nations Developement Programme (2023). An environmentally friendly method to rebuild Ukraine. http://undp.org/ukraine/news/environmentally-friendly-method-rebuild-ukraine 27) Mukete, B., Sun, Y., Zama, E., Achem, B., Mukete, T., Ndolo, L., & Lonje, B. (2016). Environmental degradation in conflict and post-conflict regions. International Journal of Environmental Protection and Policy, 4…
12.3	By 2030, halve per capita global food waste at the retail and consumer levels and reduce food losses along production and supply chains, including post-harvest losses	1		A) Peace opens up the possibility of modernizing agriculture and for better access to natural resources. Combining modern farming with sustainable bioenergy procedures can help improve living standards in rural areas and increase productivity.	1		11) Gonzalez-Salazar, M. A., Venturini, M., Poganietz, W. R., Finkenrath, M., & Leal, M. R. L. (2017). Combining an accelerated deployment of bioenergy and land use strategies: Review and insights for a post-conflict scenario in Colombia. Renewable and Sustainable Energy Reviews, 73, 159-177.
12.4	By 2020, achieve the environmentally sound management of chemicals and all wastes throughout their life cycle, in accordance with agreed international frameworks, and significantly reduce their release to air, water and soil in order to minimize their adverse impacts on human health and the environment			No published evidence
12.5	By 2030, substantially reduce waste generation through prevention, reduction, recycling and reuse		1	B) As 9.4	1		20) Månsson, A. (2014). Energy, conflict and war: Towards a conceptual framework. Energy Research & Social Science, 4, 106-116.
12.6	Encourage companies, especially large and transnational companies, to adopt sustainable practices and to integrate sustainability information into their reporting cycle			No published evidence
12.7	Promote public procurement practices that are sustainable, in accordance with national policies and priorities		1	B) In the aftermath of Russia's invasion of Ukraine, the OECD has made a suggestion to review Ukraine's PP process for infrastructure to simplify requirements and make the process faster, thus compromising the sustainability of the infrastructure.		1	37) OECD. (2023) Public procurement in the post-war reconstruction of Ukraine – main challenges. Policy Responses: Ukraine, Tackling the Policy Challenges
12.8	By 2030, ensure that people everywhere have the relevant information and awareness for sustainable development and lifestyles in harmony with nature			No published evidence
12.a	Support developing countries to strengthen their scientific and technological capacity to move towards more sustainable patterns of consumption and production		0	No published evidence	0
12.b	Develop and implement tools to monitor sustainable development impacts for sustainable tourism that creates jobs and promotes local culture and products	0	0	No published evidence	0	0
12.c	Rationalize inefficient fossil-fuel subsidies that encourage wasteful consumption by removing market distortions, in accordance with national circumstances, including by restructuring taxation and phasing out those harmful subsidies, where they exist, to reflect their environmental impacts, taking fully into account the specific needs and conditions of developing countries and minimizing the poss…			No published evidence	0
Goal 13. Take urgent action to combat climate change and its impacts
13.1	Strengthen resilience and adaptive capacity to climate-related hazards and natural disasters in all countries	1		A) Climate adaptation strategies and conflict resilience strategies for energy proposes similar approaches and can therefore provide synergies with the target. A robust energy system that can withstand shock and have a fast recovery is both suitable for natural disasters as well as conflict.	1		23) Al-Saidi, M., Roach, E. L., & Al-Saeedi, B. A. H. (2020). Conflict resilience of water and energy supply infrastructure: Insights from Yemen. Water, 12(11), 3269. 24) Xu, L., Feng, K., Lin, N., Perera, A. T. D., Poor, H. V., Xie, L., ... & O’Malley, M. (2024). Resilience of renewable power systems under climate risks. Nature Reviews Electrical Engineering, 1(1), 53-66.
13.2	Integrate climate change measures into national policies, strategies and planning	1	1	A) Renewable energy, particularly solar power, can quickly deliver energy and is relatively easy to implement, making it an effective solution for urgent energy needs following a conflict. B) Displaced communities typically rely on traditional fuels which emit high concentrations of GHG-emissions. The urgent need for energy can sometimes call for fast and easy energy provision in the form of for …	1		1) Thomas, P. J. M., Rosenberg-Jansen, S., & Jenks, A. (2021). Moving beyond informal action: sustainable energy and the humanitarian response system. Journal of International Humanitarian Action, 6, 1-20. 19) Esmenjaud, R., & Rutenbar, S. (2025). Renewable Energy and Peace in the Central African Republic.
13.3	Improve education, awareness-raising and human and institutional capacity on climate change mitigation, adaptation, impact reduction and early warning			No published evidence
13.a	Implement the commitment undertaken by developed-country parties to the United Nations Framework Convention on Climate Change to a goal of mobilizing jointly $100 billion annually by 2020 from all sources to address the needs of developing countries in the context of meaningful mitigation actions and transparency on implementation and fully operationalize the Green Climate Fund through its capita…		0	No published evidence
13.b	Promote mechanisms for raising capacity for effective climate change-related planning and management in least developed countries and small island developing States, including focusing on women, youth and local and marginalized communities		0	No published evidence
Goal 14. Conserve and sustainably use the oceans, seas and marine resources for sustainable development
14.1	By 2025, prevent and significantly reduce marine pollution of all kinds, in particular from land-based activities, including marine debris and nutrient pollution			No published evidence
14.2	By 2020, sustainably manage and protect marine and coastal ecosystems to avoid significant adverse impacts, including by strengthening their resilience, and take action for their restoration in order to achieve healthy and productive oceans			No published evidence
14.3	Minimize and address the impacts of ocean acidification, including through enhanced scientific cooperation at all levels		1	B) Displaced communities and peacebuilding missions typically rely on traditional fuels (mainly diesel generators) which emit high concentrations of pollutants including carbon monoxide, particulate matter and other organic compounds when burned. Since diesel generators can be an efficient solution for fast energy, CO2 emissions can cause ocean acidification	1		18) Findlay, H. S., & Turley, C. (2021). Ocean acidification and climate change. In Climate change (pp. 251-279). Elsevier. 19) Esmenjaud, R., & Rutenbar, S. (2025). Renewable Energy and Peace in the Central African Republic.
14.4	By 2020, effectively regulate harvesting and end overfishing, illegal, unreported and unregulated fishing and destructive fishing practices and implement science-based management plans, in order to restore fish stocks in the shortest time feasible, at least to levels that can produce maximum sustainable yield as determined by their biological characteristics			No published evidence
14.5	By 2020, conserve at least 10 per cent of coastal and marine areas, consistent with national and international law and based on the best available scientific information			No published evidence
14.6	By 2020, prohibit certain forms of fisheries subsidies which contribute to overcapacity and overfishing, eliminate subsidies that contribute to illegal, unreported and unregulated fishing and refrain from introducing new such subsidies, recognizing that appropriate and effective special and differential treatment for developing and least developed countries should be an integral part of the World…			No published evidence
14.7	By 2030, increase the economic benefits to Small Island developing States and least developed countries from the sustainable use of marine resources, including through sustainable management of fisheries, aquaculture and tourism	1		A) SIDS are often heavily reliant on importing energy and fossil fuels from other countries (even if this has not always been the case). By having domestic renewable energy sources, SIDS are more resilient to higher prices in fossil fuels and become more resilient to conflict.	1		12) Niles, K., & Lloyd, B. (2013). Small Island Developing States (SIDS) & energy aid: Impacts on the energy sector in the caribbean and pacific. Energy Sustain Dev 17: 521–530.
14.a	Increase scientific knowledge, develop research capacity and transfer marine technology, taking into account the Intergovernmental Oceanographic Commission Criteria and Guidelines on the Transfer of Marine Technology, in order to improve ocean health and to enhance the contribution of marine biodiversity to the development of developing countries, in particular small island developing States and …		0	No published evidence
14.b	Provide access for small-scale artisanal fishers to marine resources and markets			No published evidence
14.c	Enhance the conservation and sustainable use of oceans and their resources by implementing international law as reflected in UNCLOS, which provides the legal framework for the conservation and sustainable use of oceans and their resources, as recalled in paragraph 158 of The Future We Want		0	No published evidence
Goal 15. Protect, restore and promote sustainable use of terrestrial ecosystems, sustainably manage forests, combat desertification, and halt and reverse land degradation and halt biodiversity loss
15.1	By 2020, ensure the conservation, restoration and sustainable use of terrestrial and inland freshwater ecosystems and their services, in particular forests, wetlands, mountains and drylands, in line with obligations under international agreements	1	1	A) Energy is substantial to restore terrestrial ecosystems after it being destroyed in war and conflict in for example solar irrigation and forestry tools. B) The use of solar technology means that debris from damaged and destroyed panels, along with the by-products of their combustion, now pose new environmental hazards.		1	21) United Nations Environment Programme (2024). Environmental impact of the conflict in Gaza: Preliminary assessment of environmental impacts. Nairobi. wedocs.unep.org/20.500.11822/45739 34) Shevchuk, O., Rochshyna, N., Lazarenko, I., & Stets, O. (2023, November). Towards a sustainable future: overcoming the challenges of post-war ecosystem reconstruction in Ukraine. In IOP Conference Series: Ea…
15.2	By 2020, promote the implementation of sustainable management of all types of forests, halt deforestation, restore degraded forests and substantially increase afforestation and reforestation globally	1	1	A+B) As 15.2 and that forests can be used as a local energy resource when imports for other countries can be harder to achieve due to conflicts. By using sustainable forestry for bioenergy the project can have synergies with the target. If the management is handled poorly due to urgent energy needs, trade-offs may occur.		1	34) Shevchuk, O., Rochshyna, N., Lazarenko, I., & Stets, O. (2023, November). Towards a sustainable future: overcoming the challenges of post-war ecosystem reconstruction in Ukraine. In IOP Conference Series: Earth and Environmental Science (Vol. 1269, No. 1, p. 012018). IOP Publishing. 35) Melnykovych, M., Nijnik, M., Soshenskyi, O., Zibtsev, S., Lobchenko, G., Sarkki, S., ... & Waeber, P. O. (2…
15.3	By 2030, combat desertification, restore degraded land and soil, including land affected by desertification, drought and floods, and strive to achieve a land degradation-neutral world			No published evidence
15.4	By 2030, ensure the conservation of mountain ecosystems, including their biodiversity, in order to enhance their capacity to provide benefits that are essential for sustainable development			No published evidence
15.5	Take urgent and significant action to reduce the degradation of natural habitats, halt the loss of biodiversity and, by 2020, protect and prevent the extinction of threatened species	1		A) As 15.2		1	34) Shevchuk, O., Rochshyna, N., Lazarenko, I., & Stets, O. (2023, November). Towards a sustainable future: overcoming the challenges of post-war ecosystem reconstruction in Ukraine. In IOP Conference Series: Earth and Environmental Science (Vol. 1269, No. 1, p. 012018). IOP Publishing.
15.6	Promote fair and equitable sharing of the benefits arising from the utilization of genetic resources and promote appropriate access to such resources, as internationally agreed			No published evidence
15.7	Take urgent action to end poaching and trafficking of protected species of flora and fauna and address both demand and supply of illegal wildlife products			No published evidence
15.8	By 2020, introduce measures to prevent the introduction and significantly reduce the impact of invasive alien species on land and water ecosystems and control or eradicate the priority species			No published evidence
15.9	By 2020, integrate ecosystem and biodiversity values into national and local planning, development processes, poverty reduction strategies and accounts			No published evidence
15.a	Mobilize and significantly increase financial resources from all sources to conserve and sustainably use biodiversity and ecosystems		0	No published evidence	0
15.b	Mobilize significant resources from all sources and at all levels to finance sustainable forest management and provide adequate incentives to developing countries to advance such management, including for conservation and reforestation		0	No published evidence
15.c	Enhance global support for efforts to combat poaching and trafficking of protected species, including by increasing the capacity of local communities to pursue sustainable livelihood opportunities	0	0	No published evidence	0	0
Goal 16. Promote peaceful and inclusive societies for sustainable development, provide access to justice for all and build effective, accountable and inclusive institutions at all levels
16.1	Significantly reduce all forms of violence and related death rates everywhere	1		A) Energy is imperative for peace and can for instance speed up the recovery for economic recovery in a post-conflict country leading to more stability and peace.	1		2) Ahmad, A., Chite, P., & Saghir, J. (2019). Post-conflict energy planning in the Middle East. Payne Institute,< aub. edu. lb/ifi/Documents/programs/energy_policy_and_security/articles/20191105_post_conflict_energy_ planning_in_middle_east. pdf> accessed, 11, 2021.
16.2	End abuse, exploitation, trafficking and all forms of violence against and torture of children	1		A) As 16.1	1		2) Ahmad, A., Chite, P., & Saghir, J. (2019). Post-conflict energy planning in the Middle East. Payne Institute,< aub. edu. lb/ifi/Documents/programs/energy_policy_and_security/articles/20191105_post_conflict_energy_ planning_in_middle_east. pdf> accessed, 11, 2021.
16.3	Promote the rule of law at the national and international levels and ensure equal access to justice for all			No published evidence
16.4	By 2030, significantly reduce illicit financial and arms flows, strengthen the recovery and return of stolen assets and combat all forms of organized crime	1		A) After a conflict water, as a scarce resource, can be illegally sold and in control by gangs. By connecting the energy system with the water, using energy for groundwater extraction and cleaning of drinking water, the ownership of water and money flow can be returned to the state and the people.	1	1	23) Al-Saidi, M., Roach, E. L., & Al-Saeedi, B. A. H. (2020). Conflict resilience of water and energy supply infrastructure: Insights from Yemen. Water, 12(11), 3269. 25) Schillinger, J., Özerol, G., & Heldeweg, M. (2022). A social-ecological systems perspective on the impacts of armed conflict on water resources management: Case studies from the Middle East. Geoforum, 133, 101-116 26) Weinthal, …
16.5	Substantially reduce corruption and bribery in all their forms		1	B) Corruption is endemic and pervasive in most post-conflict societies and can affect the management of energy projects	1	1	32) Le Billon, P. (2008). Corrupting peace? Peacebuilding and post-conflict corruption. International peacekeeping, 15(3), 344-361. 33) Rimšaitė, L. (2019). Corruption risk mitigation in energy sector: Issues and challenges. Energy Policy, 125, 260-266.
16.6	Develop effective, accountable and transparent institutions at all levels			No published evidence
16.7	Ensure responsive, inclusive, participatory and representative decision-making at all levels	1	1	A + B) Energy projects in conflict areas benefit from community-led and public participation projects. However projects in post-conflict areas are not like this in nature and can vary depending on the project management.	1	1	3) Roach, E. L., & Al-Saidi, M. (2021). Rethinking infrastructure rehabilitation: Conflict resilience of urban water and energy supply in the Middle East and South Sudan. Energy Research & Social Science, 76, 102052. 14) Anand, P. B. (2005). Getting infrastructure priorities right in post-conflict reconstruction (No. 2005/42). WIDER Research Paper.
16.8	Broaden and strengthen the participation of developing countries in the institutions of global governance			No published evidence
16.9	By 2030, provide legal identity for all, including birth registration			No published evidence
16.1	Ensure public access to information and protect fundamental freedoms, in accordance with national legislation and international agreements		1	B) In post-conflict areas, information can sometimes be hard to provide and a speedy recovery can sometimes be prioritised higher than participatory projects.	1	1	14) Anand, P. B. (2005). Getting infrastructure priorities right in post-conflict reconstruction (No. 2005/42). WIDER Research Paper.
16.a	Strengthen relevant national institutions, including through international cooperation, for building capacity at all levels, in particular in developing countries, to prevent violence and combat terrorism and crime		0	No published evidence		0
16.b	Promote and enforce non-discriminatory laws and policies for sustainable development		0	No published evidence		0
Goal 17. Strengthen the means of implementation and revitalize the global partnership for sustainable development
17.1	Strengthen domestic resource mobilization, including through international support to developing countries, to improve domestic capacity for tax and other revenue collection	1		A) Facilitating investments, i.e. through microfinancing, an energy project can contribute to strengthening the domestic resource mobilisation.	1		3) Roach, E. L., & Al-Saidi, M. (2021). Rethinking infrastructure rehabilitation: Conflict resilience of urban water and energy supply in the Middle East and South Sudan. Energy Research & Social Science, 76, 102052. 13) Enhanced Rural Resilience in Yemen: ERRY Achievements 2016–2017
17.2	Developed countries to implement fully their official development assistance commitments, including the commitment by many developed countries to achieve the target of 0.7 per cent of ODA/GNI to developing countries and 0.15 to 0.20 per cent of ODA/GNI to least developed countries; ODA providers are encouraged to consider setting a target to provide at least 0.20 per cent of ODA/GNI to least deve…	1		A) Many humanitarian aid projects in post conflict countries come from developed countries and The World Bank. Many times the aid is not specifically announced to be used for energy systems but some is allocated to sanitary projects or water access where energy plays a big part.		1	31) World Bank. 2024. World Bank Annual Report 2024. Washington, DC: World Bank. doi: 10.1596/AR2024EN.
17.3	Mobilize additional financial resources for developing countries from multiple sources	1		As 17.2		1	31) World Bank. 2024. World Bank Annual Report 2024. Washington, DC: World Bank. doi: 10.1596/AR2024EN.
17.4	Assist developing countries in attaining long-term debt sustainability through coordinated policies aimed at fostering debt financing, debt relief and debt restructuring, as appropriate, and address the external debt of highly indebted poor countries to reduce debt distress			No published evidence
17.5	Adopt and implement investment promotion regimes for least developed countries	1		As 17.2		1	31) World Bank. 2024. World Bank Annual Report 2024. Washington, DC: World Bank. doi: 10.1596/AR2024EN.
17.6	Enhance North-South, South-South and triangular regional and international cooperation on and access to science, technology and innovation and enhance knowledge sharing on mutually agreed terms, including through improved coordination among existing mechanisms, in particular at the United Nations level, and through a global technology facilitation mechanism			No published evidence
17.7	Promote the development, transfer, dissemination and diffusion of environmentally sound technologies to developing countries on favourable terms, including on concessional and preferential terms, as mutually agreed	1		As 17.2		1	31) World Bank. 2024. World Bank Annual Report 2024. Washington, DC: World Bank. doi: 10.1596/AR2024EN.
17.8	Fully operationalize the technology bank and science, technology and innovation capacity-building mechanism for least developed countries by 2017 and enhance the use of enabling technology, in particular information and communications technology			No published evidence
17.9	Enhance international support for implementing effective and targeted capacity-building in developing countries to support national plans to implement all the sustainable development goals, including through North-South, South-South and triangular cooperation	1		As 17.2		1	31) World Bank. 2024. World Bank Annual Report 2024. Washington, DC: World Bank. doi: 10.1596/AR2024EN.
17.1	Promote a universal, rules-based, open, non-discriminatory and equitable multilateral trading system under the World Trade Organization, including through the conclusion of negotiations under its Doha Development Agenda			No published evidence
17.11	Significantly increase the exports of developing countries, in particular with a view to doubling the least developed countries’ share of global exports by 2020			No published evidence
17.12	Realize timely implementation of duty-free and quota-free market access on a lasting basis for all least developed countries, consistent with World Trade Organization decisions, including by ensuring that preferential rules of origin applicable to imports from least developed countries are transparent and simple, and contribute to facilitating market access			No published evidence
17.13	Enhance global macroeconomic stability, including through policy coordination and policy coherence			No published evidence
17.14	Enhance policy coherence for sustainable development	1		As 17.2		1	31) World Bank. 2024. World Bank Annual Report 2024. Washington, DC: World Bank. doi: 10.1596/AR2024EN.
17.15	Respect each country’s policy space and leadership to establish and implement policies for poverty eradication and sustainable development			No published evidence
17.16	Enhance the global partnership for sustainable development, complemented by multi-stakeholder partnerships that mobilize and share knowledge, expertise, technology and financial resources, to support the achievement of the sustainable development goals in all countries, in particular developing countries	1		As 17.2		1	31) World Bank. 2024. World Bank Annual Report 2024. Washington, DC: World Bank. doi: 10.1596/AR2024EN.
17.17	Encourage and promote effective public, public-private and civil society partnerships, building on the experience and resourcing strategies of partnerships	1		As 17.2		1	31) World Bank. 2024. World Bank Annual Report 2024. Washington, DC: World Bank. doi: 10.1596/AR2024EN.
17.18	By 2020, enhance capacity-building support to developing countries, including for least developed countries and small island developing States, to increase significantly the availability of high-quality, timely and reliable data disaggregated by income, gender, age, race, ethnicity, migratory status, disability, geographic location and other characteristics relevant in national contexts	1		As 17.2		1	31) World Bank. 2024. World Bank Annual Report 2024. Washington, DC: World Bank. doi: 10.1596/AR2024EN.
17.19	By 2030, build on existing initiatives to develop measurements of progress on sustainable development that complement gross domestic product, and support statistical capacity-building in developing countries			No published evidence
	COUNT	80	27		56	52
	Amount of No Published Evidence	79

## Sheet: References
Referenses
1 Thomas, P. J. M., Rosenberg-Jansen, S., & Jenks, A. (2021). Moving beyond informal action: sustainable energy and the humanitarian response system. Journal of International Humanitarian Action, 6, 1–20.
2 Ahmad, A., Chite, P., & Saghir, J. (2019). Post-conflict energy planning in the Middle East. Payne Institute. Retrieved from aub.edu.lb/... (accessed 11, 2021).
3 Roach, E. L., & Al-Saidi, M. (2021). Rethinking infrastructure rehabilitation: Conflict resilience of urban water and energy supply in the Middle East and South Sudan. Energy Research & Social Science, 76, 102052.
4 UNFPA. (2007). Challenges and Good Practices in Support of Women in Conflict and Post-Conflict Situations. New York: UNFPA.
5 Maier, E., Constant, S., & Ahmad, A. (2020). Gender in Energy Interventions in Fragile and Conflict Situations.
6 UNFPA. (2017). The Humanitarian Impact of Gaza’s Electricity and Fuel Crisis on Gender-Based Violence and Services. New York: UNFPA.
7 UN Women & UNIDO. (2023). Gender Equality and the Sustainable Energy Transition. New York & Vienna.
9 Assem, A., Abdelmohsen, S., & Ezzeldin, M. (2019). Smart management of the reconstruction process of post-conflict cities. Archnet-IJAR, 14(2), 325–343.
10 Al-akori, A., Ansari, D., Cader, C., Brahim, W., & Blechinger, P. (2023). Conflict, health, and electricity: Electrification of healthcare facilities in Yemen. Energy Research & Social Science, 95, 102905.
11 Gonzalez-Salazar, M. A., Venturini, M., Poganietz, W. R., Finkenrath, M., & Leal, M. R. L. (2017). Bioenergy deployment and land use strategies: Post-conflict Colombia. Renewable and Sustainable Energy Reviews, 73, 159–177.
12 Niles, K., & Lloyd, B. (2013). Small Island Developing States (SIDS) & energy aid: Impacts in the Caribbean and Pacific. Energy Sustain Dev 17: 521–530.
13 Enhanced Rural Resilience in Yemen (ERRY): Achievements 2016–2017.
14 Anand, P. B. (2005). Getting infrastructure priorities right in post-conflict reconstruction. WIDER Research Paper 2005/42.
15 UNOPS. (n.d.). Improving safety and security in post-conflict countries.
16 People, T. A. A. (2015). Urban Services During Protracted Armed Conflict.
17 Thomas, P. J. M. (2016). Energy Access: Humanitarian Relief.
18 Findlay, H. S., & Turley, C. (2021). Ocean acidification and climate change. In Climate Change (pp. 251–279). Elsevier.
19 Esmenjaud, R., & Rutenbar, S. (2025). Renewable Energy and Peace in the Central African Republic.
20 Månsson, A. (2014). Energy, conflict and war: Towards a conceptual framework. Energy Research & Social Science, 4, 106–116.
21 United Nations Environment Programme. (2024). Environmental impact of the conflict in Gaza: Preliminary assessment. Nairobi.
22 UNDP. (2023). An environmentally friendly method to rebuild Ukraine.
23 Al-Saidi, M., Roach, E. L., & Al-Saeedi, B. A. H. (2020). Conflict resilience of water and energy supply infrastructure: Insights from Yemen. Water, 12(11), 3269.
24 Xu, L., Feng, K., Lin, N., Perera, A. T. D., Poor, H. V., Xie, L., & O’Malley, M. (2024). Resilience of renewable power systems under climate risks. Nature Reviews Electrical Engineering, 1(1), 53–66.
25 Schillinger, J., Özerol, G., & Heldeweg, M. (2022). Armed conflict impacts on water management: Middle East case studies. Geoforum, 133, 101–116.
26 Weinthal, E., Troell, J., & Nakayama, M. (2011). Water and post-conflict peacebuilding: Introduction. Water International, 36(2), 143–153.
27 Mukete, B., Sun, Y., Zama, E., Achem, B., Mukete, T., Ndolo, L., & Lonje, B. (2016). Environmental degradation in conflict and post-conflict regions. Int. J. Environmental Protection and Policy, 4(6), 187–195.
28 Ohiorhenuan, J. F. (2011). Post-conflict recovery: approaches, policies and partnerships. Centre for Research on Peace and Development.
29 Escobar, R., Vilar, D., Velo, E., Ferrer‑Martí, L., & Domenech, B. (2012). Local capacity development for renewable energy projects. In Modeling and optimization of renewable energy systems, 147–170.
30 Omar, F. A., Mahmoud, I., & Cedano, K. G. (2023). Energy poverty under armed conflict: Assessment challenges in wartime Syria. Energy Research & Social Science, 95, 102910.
31 World Bank. (2024). World Bank Annual Report 2024. Washington, DC. doi: 10.1596/AR2024EN.
32 Le Billon, P. (2008). Corrupting peace? Peacebuilding and post-conflict corruption. International Peacekeeping, 15(3), 344–361.
33 Rimšaitė, L. (2019). Corruption risk mitigation in the energy sector: Issues and challenges. Energy Policy, 125, 260–266.
34 Shevchuk, O., Rochshyna, N., Lazarenko, I., & Stets, O. (2023). Post-war ecosystem reconstruction in Ukraine. IOP Conf. Series: Earth & Environmental Science, 1269, 012018.
35 Melnykovych, M., et al. (2025). Pathways for Ukraine’s Post-War Recovery: Forest Socio-Ecological System in Focus.
36 Thacker, S., Adshead, D., Fay, M., Hallegatte, S., Harvey, M., Meller, H., & Hall, J. W. (2019). Infrastructure for sustainable development. Nature Sustainability, 2(4), 324–331.
37 OECD. (2023). Public procurement in the post-war reconstruction of Ukraine – main challenges. Policy Responses: Ukraine.
